# Supplementary material for: Light/Dark Shifting Promotes Alcohol-Induced Colon Carcinogenesis: Possible Role of Intestinal Inflammatory Milieu and Microbiota
Source: PubMed Central journal article supplement (PMC5187817; doi:10.3390/ijms17122017), 2016-12-02
Supplement: ijms-17-02017-s001.pdf [file ijms-17-02017-s001.pdf]

# Supplementary Materials: Light/Dark Shifting Promotes Alcohol-Induced Colon Carcinogenesis: Possible Role of Intestinal Inflammatory Milieu and Microbiota

Faraz Bishehsari, Abdulrahman Saadalla, Khashayarsha Khazaie, Phillip A. Engen, Robin M. Voigt, Brandon B. Shetuni, Christopher Forsyth, Maliha Shaikh, Martha Hotz Vitaterna, Fred Turek and Ali Keshavarzian

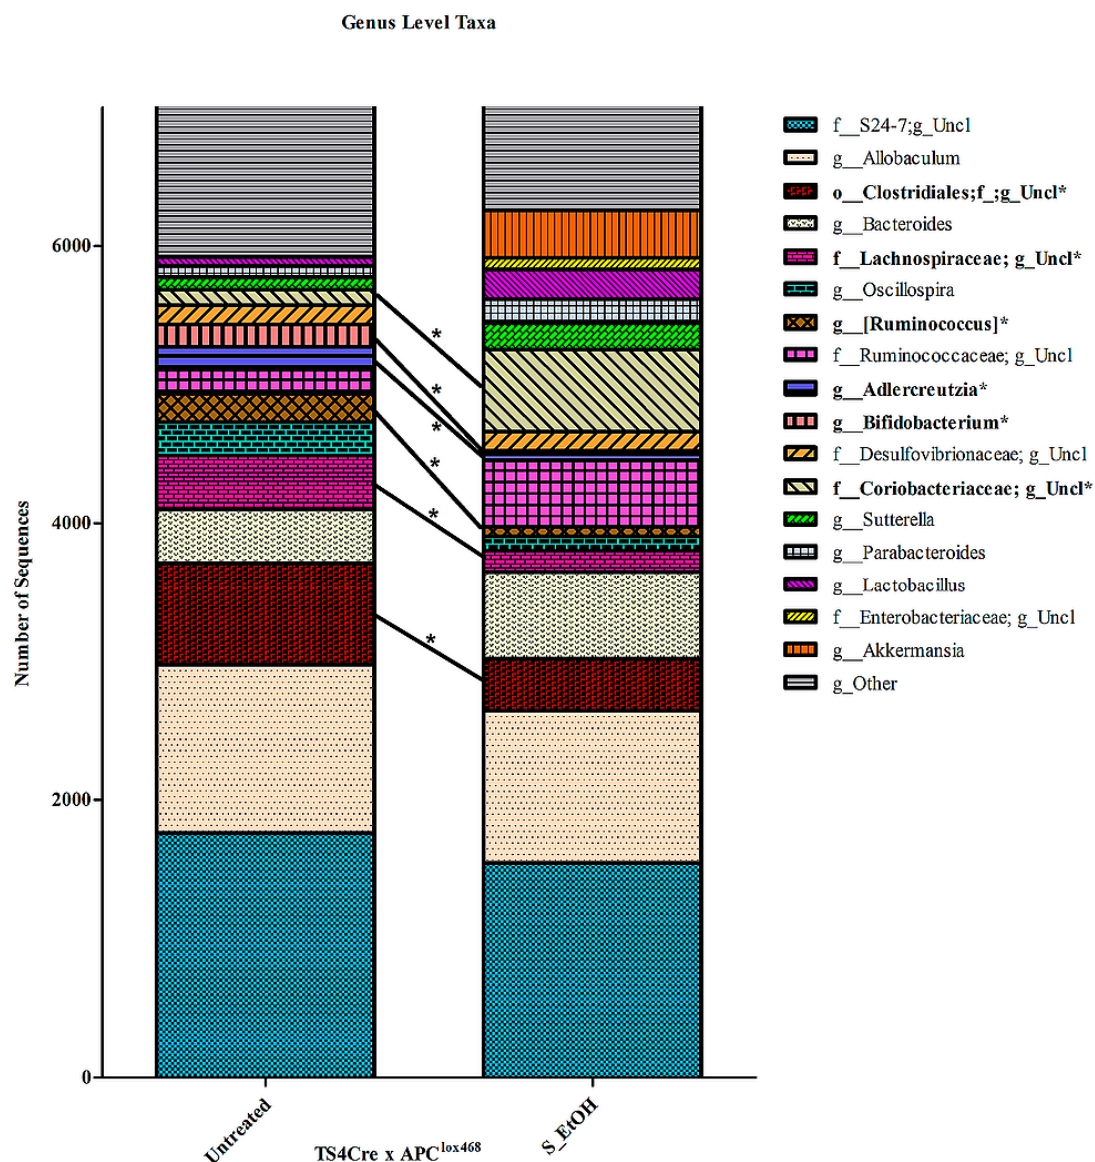

**Figure S1.** Effect of alcohol with Light:Dark (LD) shift on the microbiota. Genus taxa level relative abundances are inversely proportional and different between untreated and shifted alcohol (S\_EtOH) TS4Cre × APC<sup>lox468</sup> mice feces. The average number of sequences was rarefied to 7000 sequences per sample. \* denotes taxa differences ( $p < 0.05$ ) between untreated and S\_EtOH mice fecal samples.

Table S1.  $\alpha$  diversity indices.

| Comparison                | Taxonomic Level | $\alpha$ Diversity Index    | <i>p</i> -Value <sup>a</sup> | Mean $\pm$ SEM        | Mean $\pm$ SEM       |
|---------------------------|-----------------|-----------------------------|------------------------------|-----------------------|----------------------|
|                           |                 | Feces: NS_EtOH vs. S_EtOH   |                              |                       |                      |
| Feces: NS_EtOH vs. S_EtOH | Phylum          | Species Richness (Margalef) | 0.262 <sup>a</sup>           | 8.33 $\pm$ 0.33 (NS)  | 9.33 $\pm$ 0.49 (S)  |
| Feces: NS_EtOH vs. S_EtOH | Phylum          | Evenness (Pielou's)         | 0.905 <sup>a</sup>           | 0.61 $\pm$ 0.01 (NS)  | 0.60 $\pm$ 0.02 (S)  |
| Feces: NS_EtOH vs. S_EtOH | Phylum          | Shannon (log-e)             | 0.714 <sup>a</sup>           | 1.28 $\pm$ 0.05 (NS)  | 1.33 $\pm$ 0.06 (S)  |
| Feces: NS_EtOH vs. S_EtOH | Phylum          | Simpson (1- $\lambda$ )     | 0.548 <sup>a</sup>           | 0.66 $\pm$ 0.01 (NS)  | 0.68 $\pm$ 0.02 (S)  |
| Feces: NS_EtOH vs. S_EtOH | Class           | Species Richness (Margalef) | 0.095 <sup>a</sup>           | 14.67 $\pm$ 0.33 (NS) | 16.33 $\pm$ 0.56 (S) |
| Feces: NS_EtOH vs. S_EtOH | Class           | Evenness (Pielou's)         | 0.381 <sup>a</sup>           | 0.67 $\pm$ 0.14 (NS)  | 0.62 $\pm$ 0.02 (S)  |
| Feces: NS_EtOH vs. S_EtOH | Class           | Shannon (log-e)             | 0.905 <sup>a</sup>           | 1.81 $\pm$ 0.05 (NS)  | 1.74 $\pm$ 0.08 (S)  |
| Feces: NS_EtOH vs. S_EtOH | Class           | Simpson (1- $\lambda$ )     | 0.262 <sup>a</sup>           | 0.80 $\pm$ 0.01 (NS)  | 0.76 $\pm$ 0.02 (S)  |
| Feces: NS_EtOH vs. S_EtOH | Order           | Species Richness (Margalef) | 0.262 <sup>a</sup>           | 17.67 $\pm$ 0.88 (NS) | 19.83 $\pm$ 0.98 (S) |
| Feces: NS_EtOH vs. S_EtOH | Order           | Evenness (Pielou's)         | 0.548 <sup>a</sup>           | 0.63 $\pm$ 0.03 (NS)  | 0.59 $\pm$ 0.02 (S)  |
| Feces: NS_EtOH vs. S_EtOH | Order           | Shannon (log-e)             | 1.000 <sup>a</sup>           | 1.81 $\pm$ 0.05 (NS)  | 1.75 $\pm$ 0.08 (S)  |
| Feces: NS_EtOH vs. S_EtOH | Order           | Simpson (1- $\lambda$ )     | 0.262 <sup>a</sup>           | 0.80 $\pm$ 0.01 (NS)  | 0.76 $\pm$ 0.02 (S)  |
| Feces: NS_EtOH vs. S_EtOH | Family          | Species Richness (Margalef) | 0.548 <sup>a</sup>           | 35.00 $\pm$ 1.53 (NS) | 36.17 $\pm$ 0.95 (S) |
| Feces: NS_EtOH vs. S_EtOH | Family          | Evenness (Pielou's)         | 0.024 <sup>a</sup>           | 0.60 $\pm$ 0.01 (NS)  | 0.66 $\pm$ 0.01 (S)  |
| Feces: NS_EtOH vs. S_EtOH | Family          | Shannon (log-e)             | 0.024 <sup>a</sup>           | 2.12 $\pm$ 0.07 (NS)  | 2.35 $\pm$ 0.05 (S)  |
| Feces: NS_EtOH vs. S_EtOH | Family          | Simpson (1- $\lambda$ )     | 0.095 <sup>a</sup>           | 0.82 $\pm$ 0.01 (NS)  | 0.85 $\pm$ 0.01 (S)  |
| Feces: NS_EtOH vs. S_EtOH | Genus           | Species Richness (Margalef) | 0.048 <sup>a</sup>           | 47.33 $\pm$ 1.33 (NS) | 52.67 $\pm$ 1.48 (S) |
| Feces: NS_EtOH vs. S_EtOH | Genus           | Evenness (Pielou's)         | 0.048 <sup>a</sup>           | 0.57 $\pm$ 0.02 (NS)  | 0.63 $\pm$ 0.01 (S)  |
| Feces: NS_EtOH vs. S_EtOH | Genus           | Shannon (log-e)             | 0.024 <sup>a</sup>           | 2.21 $\pm$ 0.09 (NS)  | 2.50 $\pm$ 0.05 (S)  |
| Feces: NS_EtOH vs. S_EtOH | Genus           | Simpson (1- $\lambda$ )     | 0.048 <sup>a</sup>           | 0.83 $\pm$ 0.01 (NS)  | 0.86 $\pm$ 0.01 (S)  |
| Feces: NS_EtOH vs. S_EtOH | Species         | Species Richness (Margalef) | 0.167 <sup>a</sup>           | 51.33 $\pm$ 1.33 (NS) | 57.67 $\pm$ 1.74 (S) |
| Feces: NS_EtOH vs. S_EtOH | Species         | Evenness (Pielou's)         | 0.024 <sup>a</sup>           | 0.57 $\pm$ 0.02 (NS)  | 0.64 $\pm$ 0.01 (S)  |
| Feces: NS_EtOH vs. S_EtOH | Species         | Shannon (log-e)             | 0.024 <sup>a</sup>           | 2.24 $\pm$ 0.08 (NS)  | 2.57 $\pm$ 0.05 (S)  |
| Feces: NS_EtOH vs. S_EtOH | Species         | Simpson (1- $\lambda$ )     | 0.024 <sup>a</sup>           | 0.83 $\pm$ 0.01 (NS)  | 0.87 $\pm$ 0.01 (S)  |

<sup>a</sup> *p* < 0.05, SEM = Standard Error Mean, NS\_EtOH = non-shifted ethanol-fed mice, S\_EtOH = shifted ethanol-fed mice; The groups were compared by the Mann-Whitney test.

**Table S2.** Relative abundance of sequences derived from mice fecal taxa.

| <b>Taxonomic Level</b> | <b><i>p</i>-Value <sup>a</sup></b> | <b>FDR-<i>p</i> <sup>b</sup></b> | <b>S_ETOH # Seqs</b> | <b>NS_ETOH # Seqs</b> |
|------------------------|------------------------------------|----------------------------------|----------------------|-----------------------|
| Phylum                 |                                    |                                  |                      |                       |
| Firmicutes             | 0.02 <sup>a</sup>                  | 0.10                             | 2738.33              | 3554.67               |
| Bacteroidetes          | 0.04 <sup>a</sup>                  | 0.10                             | 2573.50              | 1277.67               |
| Actinobacteria         | 0.12                               | 0.20                             | 655.00               | 990.67                |
| Verrucomicrobia        | 0.52                               | 0.65                             | 332.00               | 271.33                |
| Proteobacteria         | 1.00                               | 1.00                             | 596.00               | 810.00                |
| Family                 |                                    |                                  |                      |                       |
| Rikenellaceae          | 0.02 <sup>a</sup>                  | 0.21                             | 74.83                | 15.00                 |
| Bacteroidaceae         | 0.04 <sup>a</sup>                  | 0.21                             | 621.00               | 82.67                 |
| Erysipelotrichaceae    | 0.04 <sup>a</sup>                  | 0.21                             | 1127.17              | 2261.67               |
| Coriobacteriaceae      | 0.07                               | 0.23                             | 632.33               | 1004.00               |
| Porphyromonadaceae     | 0.07                               | 0.23                             | 185.33               | 71.67                 |
| Desulfovibrionaceae    | 0.12                               | 0.32                             | 217.33               | 98.33                 |
| Lactobacillaceae       | 0.20                               | 0.39                             | 216.83               | 368.00                |
| Clostridiales; Other   | 0.20                               | 0.39                             | 390.17               | 116.33                |
| S24-7                  | 0.30                               | 0.54                             | 1513.50              | 988.33                |
| Helicobacteraceae      | 0.36                               | 0.58                             | 77.67                | 32.33                 |
| Lachnospiraceae        | 0.44                               | 0.58                             | 240.17               | 120.00                |
| Alcaligenaceae         | 0.44                               | 0.58                             | 196.00               | 124.00                |
| Enterobacteriaceae     | 0.52                               | 0.64                             | 87.17                | 549.67                |
| Bifidobacteriaceae     | 0.56                               | 0.64                             | 23.83                | 0.67                  |
| Verrucomicrobiaceae    | 0.79                               | 0.80                             | 326.17               | 275.00                |
| Ruminococcaceae        | 0.80                               | 0.80                             | 608.17               | 510.33                |
| Genus                  |                                    |                                  |                      |                       |
| Bacteroides            | 0.04 <sup>a</sup>                  | 0.33                             | 632.67               | 73.67                 |
| Allobaculum            | 0.04 <sup>a</sup>                  | 0.33                             | 1107.67              | 2254.00               |
| Parabacteroides        | 0.07                               | 0.40                             | 181.67               | 75.33                 |
| Adlercreutzia          | 0.20                               | 0.47                             | 50.50                | 56.67                 |
| Lactobacillus          | 0.30                               | 0.47                             | 219.17               | 353.33                |
| Oscillospira           | 0.30                               | 0.47                             | 106.33               | 46.33                 |
| Sutterella             | 0.30                               | 0.47                             | 203.00               | 127.00                |
| [Ruminococcus]         | 0.52                               | 0.63                             | 77.00                | 43.67                 |
| Akkermansia            | 0.79                               | 0.90                             | 329.33               | 288.67                |
| Bifidobacterium        | 0.88                               | 0.93                             | 21.67                | 0.33                  |

S\_EtOH = shifted ethanol-fed mice; NS\_EtOH = non-shifted ethanol-fed mice; # Seqs = average number of sequences in defined group; <sup>a</sup> *p*-value:  $p < 0.05$ ; <sup>b</sup> False Discovery Rate: FDR-*p* < 0.05.
